# Supplementary material for: The natural compound Guttiferone F sensitizes prostate cancer to starvation induced apoptosis via calcium and JNK elevation
Source: PubMed Central journal article supplement (PMC4394563; doi:10.1186/s12885-015-1292-z), 2015-04-11
Supplement: 12885_2015_1292_MOESM1_ESM.pdf [file 12885_2015_1292_MOESM1_ESM.pdf]

## 1 **Supplementary Information**

### 2 **Plant Material**

3 *Garcinia esculenta* Y. H. Li twigs were collected in August 2010 in Nujiang,  
4 Yunnan Province, People's Republic of China. Plant material was identified by Prof.  
5 Yuanchuan Zhou, Yunnan University of Traditional Chinese Medicine. A voucher  
6 specimen (Herbarium No. 20100801) has been deposited at the Innovative Research  
7 Laboratory of TCM, Shanghai University of Traditional Chinese Medicine.

### 8 **Extraction, Isolation and Identification of Guttiferone F**

9 Air-dried and powdered twigs of the plant (4 kg) were extracted with petroleum  
10 ether (5 × 20 L, two days each). The combined extracts were evaporated to dryness  
11 under vacuum to give fraction I (40 g). The remaining materials were refluxed with  
12 80% EtOH (v/v, 5 × 20 L). The combined extracts were evaporated to dryness under  
13 vacuum, and the residue was suspended in H<sub>2</sub>O (5 L) and extracted with EtOAc (5 × 5  
14 L) to give fractions II (50 g, EtOAc soluble) and III (the aqueous fraction),  
15 respectively. The remaining materials were refluxed with distilled water (5 × 20 L) to  
16 give the water-soluble fraction (IV). Fraction I (37 g) was chromatographed on a  
17 silica gel column (CC) using a gradient of petroleum ether–EtOAc (100:0 to 50:50,  
18 v/v) guided by TLC, yielding fifteen fractions (IA–IO). Fraction IL was  
19 chromatographed on MCI gel eluted successively with 90% and 100% EtOH to afford  
20 two subfractions (IL1 and IL2). Fraction IL1 (10.5 g) was subjected to reverse-phase  
21 C<sub>18</sub> silica gel CC, eluted in a step gradient manner with MeOH–H<sub>2</sub>O (70:30 to 100:0)  
22 to yield Guttiferone F (350 mg). The structure of Guttiferone F was elucidated as

23 shown (Figure 1) by comparison of their spectroscopic data with published data.[23]

24 The purity of Guttiferone F was checked by UPLC-DAD and the result displayed  
25 purity of above 98%.

#### 26 **Supplementary Chemicals**

27 Calcium chelator BAPTA-AM (Cat. A1076) and JNK inhibitor SP600125 (Cat. S5567)  
28 were purchased from Sigma-Aldrich. TMRE, (Tetramethylrhodamine, Ethyl Ester,  
29 Perchlorate, Cat. T-669) was purchased from Molecular Probes.

30
